# Supplementary material for: Social Inequality in Birth Outcomes in Korea, 1995-2008
Source: PubMed Central journal article supplement — J Korean Med Sci. 2013 Jan 8;28(1):25–35. doi: 10.3346/jkms.2013.28.1.25 (PMC3546100; doi:10.3346/jkms.2013.28.1.25), 2013-01-08
Supplement: jkms-28-25-s001.pdf [file jkms-28-25-s001.pdf]

**Supplement Table 1.** Yearly change of maternal age-adjusted rates and adjusted odds ratios of low birth weight, preterm birth, preterm birth and low birth weight, and intra uterine growth retardation in Korea from 1995 to 2008

| Birth year | Total number of births | LBW              |                      |                        | PTB              |                      |                        | PT-LBW           |                      |                        | IUGR             |                      |                        |
|------------|------------------------|------------------|----------------------|------------------------|------------------|----------------------|------------------------|------------------|----------------------|------------------------|------------------|----------------------|------------------------|
|            |                        | Number of births | Age adjusted rate %* |                        | Number of births | Age adjusted rate %* |                        | Number of births | Age adjusted rate %* |                        | Number of births | Age adjusted rate %* |                        |
|            |                        |                  | ORs                  | (95% CIs) <sup>†</sup> |
| 1995       | 711,148                | 21,520           | 3.1                  | 1.00                   | 18,119           | 2.7                  | 1.00                   | 9,470            | 1.4                  | 1.00                   | 12,050           | 1.7                  | 1.00                   |
| 1996       | 688,036                | 21,308           | 3.2                  | 1.02 (1.00-1.04)       | 21,147           | 3.3                  | 1.21 (1.19-1.24)       | 9,949            | 1.5                  | 1.08 (1.05-1.11)       | 11,359           | 1.7                  | 0.97 (0.94-0.99)       |
| 1997       | 667,182                | 21,720           | 3.4                  | 1.07 (1.05-1.10)       | 21,143           | 3.3                  | 1.25 (1.23-1.28)       | 10,287           | 1.6                  | 1.15 (1.12-1.19)       | 11,433           | 1.7                  | 1.01 (0.98-1.03)       |
| 1998       | 634,503                | 21,961           | 3.6                  | 1.13 (1.11-1.15)       | 22,091           | 3.6                  | 1.37 (1.34-1.40)       | 10,888           | 1.8                  | 1.28 (1.24-1.31)       | 11,073           | 1.8                  | 1.01 (0.98-1.04)       |
| 1999       | 612,673                | 21,921           | 3.7                  | 1.14 (1.12-1.17)       | 23,611           | 4.0                  | 1.50 (1.47-1.53)       | 11,280           | 1.9                  | 1.33 (1.29-1.37)       | 10,641           | 1.8                  | 0.99 (0.96-1.01)       |
| 2000       | 632,367                | 24,050           | 3.9                  | 1.20 (1.18-1.23)       | 23,896           | 3.8                  | 1.44 (1.41-1.47)       | 12,187           | 2.0                  | 1.36 (1.32-1.40)       | 11,863           | 1.9                  | 1.06 (1.03-1.09)       |
| 2001       | 552,562                | 21,755           | 4.0                  | 1.22 (1.19-1.24)       | 23,765           | 4.3                  | 1.62 (1.59-1.66)       | 11,587           | 2.1                  | 1.45 (1.41-1.49)       | 10,168           | 1.8                  | 1.02 (0.99-1.05)       |
| 2002       | 487,747                | 19,328           | 3.9                  | 1.19 (1.16-1.21)       | 21,493           | 4.4                  | 1.63 (1.60-1.66)       | 10,544           | 2.1                  | 1.45 (1.40-1.49)       | 8,784            | 1.8                  | 0.97 (0.94-1.00)       |
| 2003       | 485,356                | 19,705           | 4.0                  | 1.20 (1.18-1.23)       | 21,958           | 4.5                  | 1.66 (1.62-1.69)       | 11,006           | 2.2                  | 1.50 (1.46-1.54)       | 8,699            | 1.8                  | 0.96 (0.93-0.98)       |
| 2004       | 468,115                | 19,355           | 4.1                  | 1.19 (1.17-1.22)       | 21,716           | 4.5                  | 1.67 (1.63-1.70)       | 11,019           | 2.3                  | 1.52 (1.48-1.56)       | 8,336            | 1.8                  | 0.93 (0.90-0.95)       |
| 2005       | 430,559                | 18,427           | 4.2                  | 1.22 (1.19-1.24)       | 20,465           | 4.6                  | 1.68 (1.64-1.71)       | 10,482           | 2.3                  | 1.54 (1.49-1.58)       | 7,945            | 1.8                  | 0.95 (0.92-0.97)       |
| 2006       | 443,561                | 19,364           | 4.3                  | 1.20 (1.17-1.22)       | 21,584           | 4.7                  | 1.67 (1.64-1.71)       | 11,081           | 2.4                  | 1.52 (1.47-1.56)       | 8,283            | 1.9                  | 0.93 (0.90-0.96)       |
| 2007       | 488,923                | 22,753           | 4.5                  | 1.23 (1.20-1.25)       | 25,204           | 4.9                  | 1.72 (1.69-1.76)       | 13,315           | 2.6                  | 1.59 (1.54-1.63)       | 9,438            | 1.9                  | 0.92 (0.90-0.95)       |
| 2008       | 463,333                | 22,528           | 4.7                  | 1.28 (1.26-1.31)       | 25,585           | 5.3                  | 1.85 (1.81-1.89)       | 13,185           | 2.7                  | 1.65 (1.60-1.70)       | 9,343            | 2.0                  | 0.96 (0.94-0.99)       |

\*All rates are adjusted for maternal age, with the exception of the maternal age categorical variable; <sup>†</sup>ORs (95% CIs): adjusted for infant sex, maternal age, parental age, multiple birth, parity, death of previous children, and birth year.

**Supplement Table 2.** The result of test for trends for Fig. 1 and Fig. 2

| Items         | Yearly trends                                           | Test for trends                                                     |              |
|---------------|---------------------------------------------------------|---------------------------------------------------------------------|--------------|
| (For Fig. 1)  | Yearly trends of maternal age-adjusted rates for LBW    | $P < 0.0001$                                                        |              |
| Yearly trends | Yearly trends of maternal age-adjusted rates for PT     | $P < 0.0001$                                                        |              |
|               | Yearly trends of maternal age-adjusted rates for PT-LBW | $P < 0.0001$                                                        |              |
|               | Yearly trends of maternal age-adjusted rates for IUGR   | $P = 0.051$                                                         |              |
|               |                                                         |                                                                     |              |
| (For Fig. 2)  |                                                         |                                                                     |              |
| LBW           | Fathers                                                 | Yearly trends of adjusted odds ratios in the high school            | $P = 0.9841$ |
|               |                                                         | Yearly trends of adjusted odds ratios in the middle school or lower | $P = 0.8838$ |
|               |                                                         | Difference between university and high school                       | $P = 0.9888$ |
|               |                                                         | Difference between university and middle school or lower            | $P = 0.9177$ |
| LBW           | Mothers                                                 | Yearly trends of adjusted odds ratios in the high school            | $P = 0.0553$ |
|               |                                                         | Yearly trends of adjusted odds ratios in the middle school          | $P = 0.0079$ |
|               |                                                         | Difference between university and high school                       | $P = 0.1699$ |
|               |                                                         | Difference between university and middle school or lower            | $P = 0.0541$ |
| PTB           | Fathers                                                 | Yearly trends of adjusted odds ratios in the high school            | $P < 0.0001$ |
|               |                                                         | Yearly trends of adjusted odds ratios in the middle school or lower | $P < 0.0001$ |
|               |                                                         | Difference between university and high school                       | $P = 0.0002$ |
|               |                                                         | Difference between university and middle school or lower            | $P < 0.0001$ |
| PTB           | Mothers                                                 | Yearly trends of adjusted odds ratios in the high school            | $P < 0.0001$ |
|               |                                                         | Yearly trends of adjusted odds ratios in the middle school or lower | $P < 0.0001$ |
|               |                                                         | Difference between university and high school                       | $P < 0.0001$ |
|               |                                                         | Difference between university and middle school or lower            | $P < 0.0001$ |
| IUGR          | Fathers                                                 | Yearly trends of adjusted odds ratios in the high school            | $P = 0.0825$ |
|               |                                                         | Yearly trends of adjusted odds ratios in the middle school or lower | $P = 0.0047$ |
|               |                                                         | Difference between university and high school                       | $P = 0.2147$ |
|               |                                                         | Difference between university and middle school or lower            | $P = 0.0401$ |
| IUGR          | Mothers                                                 | Yearly trends of adjusted odds ratios in the high school            | $P = 0.3386$ |
|               |                                                         | Yearly trends of adjusted odds ratios in the middle school or lower | $P = 0.2016$ |
|               |                                                         | Difference between university and high school                       | $P = 0.4972$ |
|               |                                                         | Difference between university and middle school or lower            | $P = 0.3638$ |
| PT-LBW        | Fathers                                                 | Yearly trends of adjusted odds ratios in the high school            | $P = 0.0443$ |
|               |                                                         | Yearly trends of adjusted odds ratios in the middle school or lower | $P = 0.0001$ |
|               |                                                         | Difference between university and high school                       | $P = 0.1493$ |
|               |                                                         | Difference between university and middle school or lower            | $P = 0.0045$ |
| PT-LBW        | Mothers                                                 | Yearly trends of adjusted odds ratios in the high school            | $P = 0.0068$ |
|               |                                                         | Yearly trends of adjusted odds ratios in the middle school or lower | $P < 0.0001$ |
|               |                                                         | Difference between university and high school                       | $P = 0.0499$ |
|               |                                                         | Difference between university and middle school or lower            | $P = 0.003$  |
